# Supplementary material
Source: MDPI journal article supplement (https://www.mdpi.com/search?q=genes-08-00390)
Supplement: s001 [file genes-08-00390-s001.pdf]

Table S1: Generation time of all strains used in this study grown under the indicated conditions

| Strain  | Genotype               | Generation time <sup>a</sup> |      |      |       |       |       |                                     |
|---------|------------------------|------------------------------|------|------|-------|-------|-------|-------------------------------------|
|         |                        | Mixotrophic growth (hours)   |      |      |       |       |       | Chemolithoautotrophic growth (days) |
|         |                        | 2 mM                         | 4 mM | 8 mM | 12 mM | 16 mM | 20 mM |                                     |
| 110spc4 | Wild type              | 7.7                          | 8.9  | 8.1  | 8.1   | 7.3   | 8.5   | 1.4                                 |
| cox132  | <i>coxA::Tn5</i>       | -                            | 8.7  | -    | -     | -     | -     | 3.1                                 |
| 3447    | $\Delta$ <i>cycA</i>   | -                            | 9.2  | -    | -     | -     | -     | 1.7                                 |
| C3505   | $\Delta$ <i>cycB</i>   | -                            | -    | -    | -     | -     | -     | 1.2                                 |
| C3524   | $\Delta$ <i>cycBC</i>  | -                            | -    | -    | -     | -     | -     | 1.5                                 |
| 3448    | $\Delta$ <i>cycABC</i> | -                            | 7.9  | -    | -     | -     | -     | 2.3                                 |
| 6806    | $\Delta$ <i>soxR</i>   | -                            | 8.7  | -    | -     | -     | -     | 1.4                                 |
| 2494    | $\Delta$ <i>cbbR</i>   | -                            | 7.5  | -    | -     | -     | -     | 4.0                                 |
| 2426    | $\Delta$ <i>regR</i>   | -                            | 8.2  | -    | -     | -     | -     | 3.5                                 |

<sup>a</sup> Generation times were calculated from the respective growth curves shown in Fig. 2, 3, 4.
